# Supplementary material
Source: publisher figshare collection journal article supplement (https://acs.figshare.com/ndownloader/files/4481233)
Supplement: Supplementary file 1 [file 4481233]

_publ_contact_author_name 'Gilson Zeni'
_publ_contact_author_email 'gzeni@pq.cnpq.br'
_publ_contact_author_fax  '0 xx55 3220 8978'
_publ_contact_author_phone '0 xx55 3220 9462'
_publ_requested_journal  'Organic Latters' 

loop_
_publ_author_name   
'Caroline C. Schneider'
'Cristina W. Nogueira'
'Gilson Zeni'

#\#CIF_1.1
 
#  CIF produced by WinGX routine CIF_UPDATE
#  Created on 2009-09-16 at 10:29:37
#  Using CIFtbx version 2.6.2 16 Jun 1998
 
#  Dictionary name : cif_core.dic
#  Dictionary vers : 2.3
#  Request file    : f:\arquivos de programas\wingx\files\archive.dat
#  CIF files read  : teste1 sec
 
 
data_teste1
 
_audit_creation_date                    2009-09-16T10:29:37-00:00
_audit_creation_method                  'WinGX routine CIF_UPDATE'
_audit_conform_dict_name                cif_core.dic
_audit_conform_dict_version             2.3
_audit_conform_dict_location            ftp://ftp.iucr.org/pub/cif_core.dic
_publ_requested_category                FO
 
#----------------------------------------------------------------------------#
#                   CHEMICAL INFORMATION                                     #
#----------------------------------------------------------------------------#
 
_chemical_name_systematic
;
 5-benzyl-2-(4'-methoxyphenyl)-3-phenylfuran
;
_chemical_name_common                   phenylfuran
_chemical_formula_moiety                'C24 H20 O2'
_chemical_formula_sum                   'C24 H20 O2'
_chemical_formula_weight                340.4
_chemical_melting_point                 358K
 
#----------------------------------------------------------------------------#
#                   UNIT CELL INFORMATION                                    #
#----------------------------------------------------------------------------#
 
_symmetry_cell_setting                  triclinic
_symmetry_space_group_name_H-M          P-1
_symmetry_space_group_name_Hall         '-P 1'
loop_
    _symmetry_equiv_pos_as_xyz
'x, y, z'
'-x, -y, -z'
 
_cell_length_a                          9.911
_cell_length_b                          10.101
_cell_length_c                          11.103
_cell_angle_alpha                       68.09
_cell_angle_beta                        70.35
_cell_angle_gamma                       68.86
_cell_volume                            935.3
_cell_formula_units_Z                   2
_cell_measurement_temperature           293(2)
_cell_measurement_reflns_used           919
_cell_measurement_theta_min             2.613
_cell_measurement_theta_max             20.9665
 
#----------------------------------------------------------------------------#
#                   CRYSTAL INFORMATION                                      #
#----------------------------------------------------------------------------#
 
_exptl_crystal_description              block
_exptl_crystal_colour                   colorless
_exptl_crystal_size_max                 0.402
_exptl_crystal_size_mid                 0.208
_exptl_crystal_size_min                 0.168
_exptl_crystal_density_meas             none
_exptl_crystal_density_diffrn           1.209
_exptl_crystal_density_method           'not measured'
_exptl_crystal_F_000                    360
 
#----------------------------------------------------------------------------#
#                   ABSORPTION CORRECTION                                    #
#----------------------------------------------------------------------------#
 
_exptl_absorpt_coefficient_mu           0.076
_exptl_absorpt_correction_type          gaussian
_exptl_absorpt_process_details
;
 XPREP (Bruker, 2006) was used to perform the Gaussian absorption
        correction based on the face-indexed crystal size.
;
_exptl_absorpt_correction_T_min         0.8678
_exptl_absorpt_correction_T_max         0.9978
 
#----------------------------------------------------------------------------#
#                   DATA COLLECTION                                          #
#----------------------------------------------------------------------------#
 
_diffrn_ambient_temperature             293(2)
_diffrn_radiation_wavelength            0.71073
_diffrn_radiation_type                  MoK\a
_diffrn_radiation_monochromator         graphite
_diffrn_detector_area_resol_mean        none
_diffrn_measurement_device_type         'X8 APEX II'
_diffrn_measurement_method              'phi and omega scans'
_diffrn_standards_number                none
_diffrn_standards_interval_count        none
_diffrn_standards_interval_time         none
_diffrn_standards_decay_%               none
_diffrn_reflns_av_R_equivalents         0.0566
_diffrn_reflns_av_unetI/netI            0.0721
_diffrn_reflns_number                   12706
_diffrn_reflns_limit_h_min              -12
_diffrn_reflns_limit_h_max              12
_diffrn_reflns_limit_k_min              -12
_diffrn_reflns_limit_k_max              12
_diffrn_reflns_limit_l_min              -13
_diffrn_reflns_limit_l_max              13
_diffrn_reflns_theta_min                2.27
_diffrn_reflns_theta_max                26
_diffrn_reflns_theta_full               26
_diffrn_measured_fraction_theta_full
                                        0.987
_diffrn_measured_fraction_theta_max
                                        0.987
_reflns_number_total                    3624
_reflns_number_gt                       1530
_reflns_threshold_expression            >2sigma(I)
 
#----------------------------------------------------------------------------#
#                   COMPUTER PROGRAMS USED                                   #
#----------------------------------------------------------------------------#
 
_computing_data_collection              'BRUKER APEX-II'
_computing_cell_refinement              'BRUKER SAINT'
_computing_data_reduction               'BRUKER SOFTWARE'
_computing_structure_solution           'SHELX97 (Sheldrick, 1997)'
_computing_structure_refinement         'SHELXL-97 (Sheldrick, 1997)'
_computing_molecular_graphics           'ORTEP-3 (Farrugia, 2000)'
_computing_publication_material         'SHELXL-97 (Shekdrick, 1997)'
 
#----------------------------------------------------------------------------#
#                   REFINEMENT INFORMATION                                   #
#----------------------------------------------------------------------------#
 
_refine_special_details
;
 Refinement of F^2^ against ALL reflections.  The weighted R-factor wR and
 goodness of fit S are based on F^2^, conventional R-factors R are based
 on F, with F set to zero for negative F^2^. The threshold expression of
 F^2^ > 2sigma(F^2^) is used only for calculating R-factors(gt) etc. and is
 not relevant to the choice of reflections for refinement.  R-factors based
 on F^2^ are statistically about twice as large as those based on F, and R-
 factors based on ALL data will be even larger.
;
_refine_ls_structure_factor_coef        Fsqd
_refine_ls_matrix_type                  full
_refine_ls_weighting_scheme             calc
_refine_ls_weighting_details
         'calc w=1/[\s^2^(Fo^2^)+(0.0704P)^2^+0.0000P] where P=(Fo^2^+2Fc^2^)/3'
_atom_sites_solution_primary            direct
_atom_sites_solution_secondary          difmap
_atom_sites_solution_hydrogens          geom
_refine_ls_hydrogen_treatment           constr
_refine_ls_extinction_method            SHELXL
_refine_ls_extinction_expression
                                    Fc^*^=kFc[1+0.001xFc^2^\l^3^/sin(2\q)]^-1/4^
_refine_ls_extinction_coef              0.014(3)
_refine_ls_number_reflns                3624
_refine_ls_number_parameters            236
_refine_ls_number_restraints            0
_refine_ls_R_factor_all                 0.1364
_refine_ls_R_factor_gt                  0.0554
_refine_ls_wR_factor_ref                0.1624
_refine_ls_wR_factor_gt                 0.1304
_refine_ls_goodness_of_fit_ref          0.916
_refine_ls_restrained_S_all             0.916
_refine_ls_shift/su_max                 0
_refine_ls_shift/su_mean                0
_refine_diff_density_max                0.143
_refine_diff_density_min                -0.153
_refine_diff_density_rms                0.035
 
#----------------------------------------------------------------------------#
#                   ATOMIC TYPES, COORDINATES AND THERMAL PARAMETERS         #
#----------------------------------------------------------------------------#
 
loop_
    _atom_type_symbol
    _atom_type_description
    _atom_type_scat_dispersion_real
    _atom_type_scat_dispersion_imag
    _atom_type_scat_source
C C 0.0033 0.0016 'International Tables Vol C Tables 4.2.6.8 and 6.1.1.4'
H H 0 0 'International Tables Vol C Tables 4.2.6.8 and 6.1.1.4'
O O 0.0106 0.006 'International Tables Vol C Tables 4.2.6.8 and 6.1.1.4'
 
loop_
    _atom_site_label
    _atom_site_type_symbol
    _atom_site_fract_x
    _atom_site_fract_y
    _atom_site_fract_z
    _atom_site_U_iso_or_equiv
    _atom_site_adp_type
    _atom_site_occupancy
    _atom_site_symmetry_multiplicity
    _atom_site_calc_flag
    _atom_site_refinement_flags
    _atom_site_disorder_assembly
    _atom_site_disorder_group
O1 O 0.42387(15) 0.21857(19) 0.26745(15) 0.0609(5) Uani 1 1 d . . .
O2 O 0.13077(18) 0.1831(2) 0.87627(17) 0.0824(7) Uani 1 1 d . . .
C21 C 0.2330(2) 0.2215(3) 0.4702(2) 0.0503(6) Uani 1 1 d . . .
C24 C 0.1559(3) 0.1987(3) 0.7429(2) 0.0604(7) Uani 1 1 d . . .
C5 C 0.4421(2) 0.2350(3) 0.1346(2) 0.0579(7) Uani 1 1 d . . .
C31 C 0.0402(2) 0.2702(3) 0.2543(2) 0.0509(6) Uani 1 1 d . . .
C2 C 0.2735(2) 0.2325(3) 0.3276(2) 0.0513(7) Uani 1 1 d . . .
C25 C 0.3037(3) 0.1641(3) 0.6762(3) 0.0696(8) Uani 1 1 d . . .
H25 H 0.3781 0.1331 0.7219 0.084 Uiso 1 1 calc R . .
C23 C 0.0455(3) 0.2468(3) 0.6741(3) 0.0672(8) Uani 1 1 d . . .
H23 H -0.0542 0.2711 0.718 0.081 Uiso 1 1 calc R . .
C4 C 0.3101(2) 0.2580(3) 0.1107(2) 0.0589(7) Uani 1 1 d . . .
H4 H 0.2929 0.2731 0.0286 0.071 Uiso 1 1 calc R . .
C51 C 0.5985(3) 0.2226(4) 0.0549(2) 0.0797(9) Uani 1 1 d . . .
H51A H 0.6591 0.1236 0.0888 0.096 Uiso 1 1 calc R . .
H51B H 0.6361 0.2919 0.0672 0.096 Uiso 1 1 calc R . .
C22 C 0.0851(2) 0.2583(3) 0.5391(2) 0.0653(8) Uani 1 1 d . . .
H22 H 0.0105 0.2915 0.4932 0.078 Uiso 1 1 calc R . .
C52 C 0.6153(2) 0.2529(3) -0.0921(2) 0.0561(7) Uani 1 1 d . . .
C26 C 0.3411(3) 0.1757(3) 0.5416(2) 0.0638(8) Uani 1 1 d . . .
H26 H 0.4409 0.1522 0.4978 0.077 Uiso 1 1 calc R . .
C36 C -0.0164(3) 0.1482(3) 0.3151(2) 0.0647(8) Uani 1 1 d . . .
H36 H 0.0464 0.0554 0.3458 0.078 Uiso 1 1 calc R . .
C35 C -0.1651(3) 0.1621(4) 0.3311(3) 0.0747(9) Uani 1 1 d . . .
H35 H -0.201 0.0787 0.3725 0.09 Uiso 1 1 calc R . .
C27 C -0.0196(3) 0.2033(4) 0.9526(3) 0.0919(10) Uani 1 1 d . . .
H27A H -0.0221 0.1895 1.0436 0.138 Uiso 1 1 calc R . .
H27B H -0.0607 0.1323 0.9492 0.138 Uiso 1 1 calc R . .
H27C H -0.0771 0.3016 0.9163 0.138 Uiso 1 1 calc R . .
C3 C 0.2002(2) 0.2551(3) 0.2350(2) 0.0528(7) Uani 1 1 d . . .
C53 C 0.6160(3) 0.3922(3) -0.1788(3) 0.0691(8) Uani 1 1 d . . .
H53 H 0.6045 0.4688 -0.1459 0.083 Uiso 1 1 calc R . .
C56 C 0.6521(3) 0.1701(5) -0.2799(4) 0.0901(11) Uani 1 1 d . . .
H56 H 0.6646 0.0939 -0.3138 0.108 Uiso 1 1 calc R . .
C32 C -0.0569(3) 0.4041(3) 0.2090(3) 0.0825(9) Uani 1 1 d . . .
H32 H -0.0219 0.488 0.1657 0.099 Uiso 1 1 calc R . .
C55 C 0.6512(3) 0.3100(5) -0.3641(3) 0.0943(12) Uani 1 1 d . . .
H55 H 0.6628 0.3291 -0.4551 0.113 Uiso 1 1 calc R . .
C34 C -0.2595(3) 0.2965(4) 0.2869(3) 0.0753(9) Uani 1 1 d . . .
H34 H -0.3594 0.3053 0.2979 0.09 Uiso 1 1 calc R . .
C57 C 0.6344(3) 0.1425(4) -0.1450(3) 0.0753(9) Uani 1 1 d . . .
H57 H 0.6355 0.0473 -0.0887 0.09 Uiso 1 1 calc R . .
C54 C 0.6335(3) 0.4196(4) -0.3140(3) 0.0881(10) Uani 1 1 d . . .
H54 H 0.633 0.5145 -0.371 0.106 Uiso 1 1 calc R . .
C33 C -0.2057(3) 0.4171(4) 0.2264(3) 0.0933(11) Uani 1 1 d . . .
H33 H -0.2693 0.5095 0.1963 0.112 Uiso 1 1 calc R . .
 
loop_
    _atom_site_aniso_label
    _atom_site_aniso_U_11
    _atom_site_aniso_U_22
    _atom_site_aniso_U_33
    _atom_site_aniso_U_23
    _atom_site_aniso_U_13
    _atom_site_aniso_U_12
O1 0.0417(9) 0.0888(14) 0.0502(11) -0.0209(9) -0.0017(7) -0.0228(8)
O2 0.0668(12) 0.1374(19) 0.0495(12) -0.0330(11) -0.0027(9) -0.0385(12)
C21 0.0420(13) 0.0622(18) 0.0480(15) -0.0178(13) -0.0061(11) -0.0174(12)
C24 0.0580(16) 0.083(2) 0.0453(16) -0.0199(14) -0.0066(13) -0.0276(14)
C5 0.0503(15) 0.077(2) 0.0413(15) -0.0169(13) 0.0003(11) -0.0223(13)
C31 0.0476(14) 0.0614(18) 0.0440(14) -0.0113(13) -0.0106(11) -0.0192(13)
C2 0.0402(12) 0.0617(18) 0.0507(15) -0.0135(13) -0.0046(11) -0.0204(12)
C25 0.0492(15) 0.105(2) 0.0554(17) -0.0170(16) -0.0104(12) -0.0299(15)
C23 0.0433(14) 0.106(2) 0.0579(17) -0.0384(16) -0.0044(12) -0.0177(14)
C4 0.0511(14) 0.075(2) 0.0504(15) -0.0180(14) -0.0073(12) -0.0210(13)
C51 0.0516(15) 0.126(3) 0.0529(17) -0.0269(17) 0.0022(13) -0.0258(16)
C22 0.0436(14) 0.098(2) 0.0566(17) -0.0291(16) -0.0095(12) -0.0155(14)
C52 0.0421(13) 0.071(2) 0.0516(16) -0.0216(16) -0.0007(11) -0.0165(13)
C26 0.0433(13) 0.093(2) 0.0546(17) -0.0189(15) -0.0060(12) -0.0246(14)
C36 0.0540(15) 0.0619(19) 0.0717(19) -0.0162(15) -0.0063(13) -0.0188(14)
C35 0.0594(17) 0.092(3) 0.082(2) -0.0353(19) 0.0040(15) -0.0399(18)
C27 0.0775(19) 0.144(3) 0.0572(18) -0.0421(19) 0.0116(15) -0.0451(19)
C3 0.0464(13) 0.0627(18) 0.0472(15) -0.0140(13) -0.0031(11) -0.0212(12)
C53 0.0637(17) 0.066(2) 0.071(2) -0.0270(17) -0.0064(14) -0.0121(15)
C56 0.0654(19) 0.119(3) 0.111(3) -0.077(3) -0.007(2) -0.019(2)
C32 0.0616(18) 0.074(2) 0.096(2) 0.0041(18) -0.0224(16) -0.0262(17)
C55 0.067(2) 0.152(4) 0.061(2) -0.047(3) -0.0031(16) -0.019(2)
C34 0.0523(16) 0.122(3) 0.0606(19) -0.0323(19) -0.0079(14) -0.0322(19)
C57 0.0611(17) 0.077(2) 0.090(2) -0.0306(19) -0.0054(15) -0.0254(15)
C54 0.077(2) 0.095(3) 0.062(2) -0.0023(19) -0.0069(16) -0.0192(18)
C33 0.0565(18) 0.096(3) 0.099(3) 0.003(2) -0.0259(17) -0.0148(17)
 
 
#----------------------------------------------------------------------------#
#                   MOLECULAR GEOMETRY                                       #
#----------------------------------------------------------------------------#
 
_geom_special_details
;
 All esds (except the esd in the dihedral angle between two l.s. planes)
 are estimated using the full covariance matrix.  The cell esds are taken
 into account individually in the estimation of esds in distances, angles
 and torsion angles; correlations between esds in cell parameters are only
 used when they are defined by crystal symmetry.  An approximate (isotropic)
 treatment of cell esds is used for estimating esds involving l.s. planes.
;
loop_
    _geom_bond_atom_site_label_1
    _geom_bond_atom_site_label_2
    _geom_bond_distance
    _geom_bond_site_symmetry_2
    _geom_bond_publ_flag
O1 C5 1.376(3) . ?
O1 C2 1.391(2) . ?
O2 C24 1.373(3) . ?
O2 C27 1.429(3) . ?
C21 C26 1.389(3) . ?
C21 C22 1.392(3) . ?
C21 C2 1.468(3) . ?
C24 C25 1.383(3) . ?
C24 C23 1.385(3) . ?
C5 C4 1.343(3) . ?
C5 C51 1.490(3) . ?
C31 C32 1.374(3) . ?
C31 C36 1.383(3) . ?
C31 C3 1.485(3) . ?
C2 C3 1.359(3) . ?
C25 C26 1.384(3) . ?
C23 C22 1.386(3) . ?
C4 C3 1.441(3) . ?
C51 C52 1.505(3) . ?
C52 C57 1.373(4) . ?
C52 C53 1.378(3) . ?
C36 C35 1.385(3) . ?
C35 C34 1.362(4) . ?
C53 C54 1.382(4) . ?
C56 C55 1.372(4) . ?
C56 C57 1.378(4) . ?
C32 C33 1.384(3) . ?
C55 C54 1.349(4) . ?
C34 C33 1.356(4) . ?
 
loop_
    _geom_angle_atom_site_label_1
    _geom_angle_atom_site_label_2
    _geom_angle_atom_site_label_3
    _geom_angle
    _geom_angle_site_symmetry_1
    _geom_angle_site_symmetry_3
    _geom_angle_publ_flag
C5 O1 C2 107.23(17) . . ?
C24 O2 C27 117.6(2) . . ?
C26 C21 C22 117.2(2) . . ?
C26 C21 C2 121.23(19) . . ?
C22 C21 C2 121.5(2) . . ?
O2 C24 C25 115.4(2) . . ?
O2 C24 C23 124.8(2) . . ?
C25 C24 C23 119.8(2) . . ?
C4 C5 O1 109.57(19) . . ?
C4 C5 C51 136.2(2) . . ?
O1 C5 C51 114.2(2) . . ?
C32 C31 C36 117.1(2) . . ?
C32 C31 C3 121.8(2) . . ?
C36 C31 C3 121.0(2) . . ?
C3 C2 O1 109.3(2) . . ?
C3 C2 C21 136.1(2) . . ?
O1 C2 C21 114.64(19) . . ?
C24 C25 C26 120.0(2) . . ?
C24 C23 C22 119.3(2) . . ?
C5 C4 C3 107.7(2) . . ?
C5 C51 C52 113.8(2) . . ?
C23 C22 C21 122.0(2) . . ?
C57 C52 C53 117.7(3) . . ?
C57 C52 C51 121.5(3) . . ?
C53 C52 C51 120.8(3) . . ?
C25 C26 C21 121.6(2) . . ?
C31 C36 C35 121.0(3) . . ?
C34 C35 C36 120.8(3) . . ?
C2 C3 C4 106.2(2) . . ?
C2 C3 C31 128.4(2) . . ?
C4 C3 C31 125.4(2) . . ?
C52 C53 C54 120.9(3) . . ?
C55 C56 C57 119.9(3) . . ?
C31 C32 C33 121.5(3) . . ?
C54 C55 C56 119.6(3) . . ?
C33 C34 C35 118.9(3) . . ?
C52 C57 C56 121.3(3) . . ?
C55 C54 C53 120.6(3) . . ?
C34 C33 C32 120.7(3) . . ?
 
loop_
    _geom_torsion_atom_site_label_1
    _geom_torsion_atom_site_label_2
    _geom_torsion_atom_site_label_3
    _geom_torsion_atom_site_label_4
    _geom_torsion
    _geom_torsion_site_symmetry_1
    _geom_torsion_site_symmetry_2
    _geom_torsion_site_symmetry_3
    _geom_torsion_site_symmetry_4
    _geom_torsion_publ_flag
C27 O2 C24 C25 -174.0(2) . . . . ?
C27 O2 C24 C23 6.7(4) . . . . ?
C2 O1 C5 C4 -0.1(3) . . . . ?
C2 O1 C5 C51 -179.9(2) . . . . ?
C5 O1 C2 C3 0.8(3) . . . . ?
C5 O1 C2 C21 -178.6(2) . . . . ?
C26 C21 C2 C3 170.4(3) . . . . ?
C22 C21 C2 C3 -10.4(5) . . . . ?
C26 C21 C2 O1 -10.4(3) . . . . ?
C22 C21 C2 O1 168.8(2) . . . . ?
O2 C24 C25 C26 179.8(2) . . . . ?
C23 C24 C25 C26 -0.9(4) . . . . ?
O2 C24 C23 C22 179.9(2) . . . . ?
C25 C24 C23 C22 0.6(4) . . . . ?
O1 C5 C4 C3 -0.5(3) . . . . ?
C51 C5 C4 C3 179.1(3) . . . . ?
C4 C5 C51 C52 5.0(5) . . . . ?
O1 C5 C51 C52 -175.3(2) . . . . ?
C24 C23 C22 C21 0.6(4) . . . . ?
C26 C21 C22 C23 -1.5(4) . . . . ?
C2 C21 C22 C23 179.3(2) . . . . ?
C5 C51 C52 C57 -87.3(3) . . . . ?
C5 C51 C52 C53 94.5(3) . . . . ?
C24 C25 C26 C21 -0.1(4) . . . . ?
C22 C21 C26 C25 1.2(4) . . . . ?
C2 C21 C26 C25 -179.6(2) . . . . ?
C32 C31 C36 C35 -1.0(4) . . . . ?
C3 C31 C36 C35 -178.9(2) . . . . ?
C31 C36 C35 C34 0.2(4) . . . . ?
O1 C2 C3 C4 -1.1(3) . . . . ?
C21 C2 C3 C4 178.1(3) . . . . ?
O1 C2 C3 C31 177.4(2) . . . . ?
C21 C2 C3 C31 -3.4(5) . . . . ?
C5 C4 C3 C2 1.0(3) . . . . ?
C5 C4 C3 C31 -177.6(2) . . . . ?
C32 C31 C3 C2 107.5(3) . . . . ?
C36 C31 C3 C2 -74.8(4) . . . . ?
C32 C31 C3 C4 -74.2(4) . . . . ?
C36 C31 C3 C4 103.5(3) . . . . ?
C57 C52 C53 C54 0.8(4) . . . . ?
C51 C52 C53 C54 179.1(2) . . . . ?
C36 C31 C32 C33 1.6(4) . . . . ?
C3 C31 C32 C33 179.4(3) . . . . ?
C57 C56 C55 C54 0.2(4) . . . . ?
C36 C35 C34 C33 0.1(4) . . . . ?
C53 C52 C57 C56 -0.7(4) . . . . ?
C51 C52 C57 C56 -179.0(2) . . . . ?
C55 C56 C57 C52 0.2(4) . . . . ?
C56 C55 C54 C53 -0.1(4) . . . . ?
C52 C53 C54 C55 -0.4(4) . . . . ?
C35 C34 C33 C32 0.4(5) . . . . ?
C31 C32 C33 C34 -1.3(5) . . . . ?
 
